# Supplementary material
Source: HighWire-hosted journal article supplement (http://www.qdcxjkg.com/highwire/filestream/113627/field_highwire_adjunct_files/3/verbanck_lci_in_adult_cf_fig_os3_r1.pdf)

Figure OS3

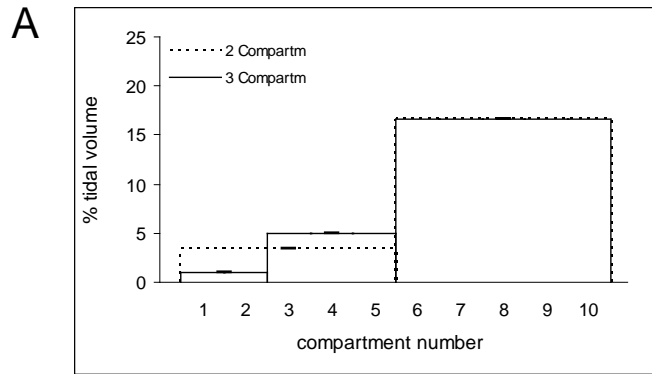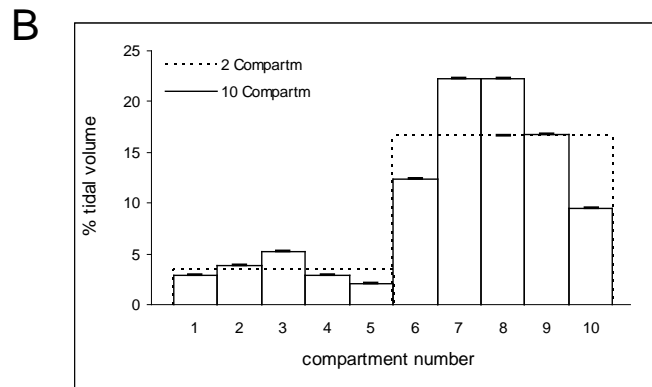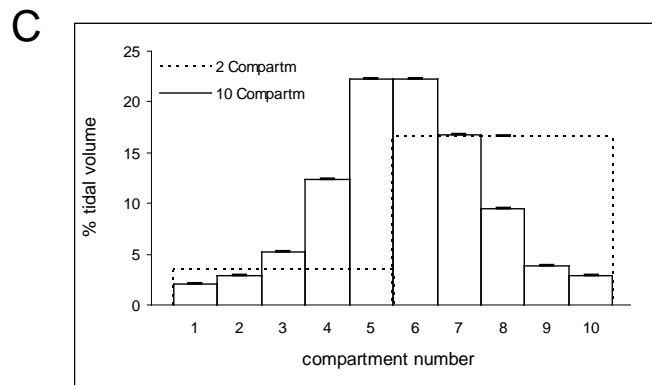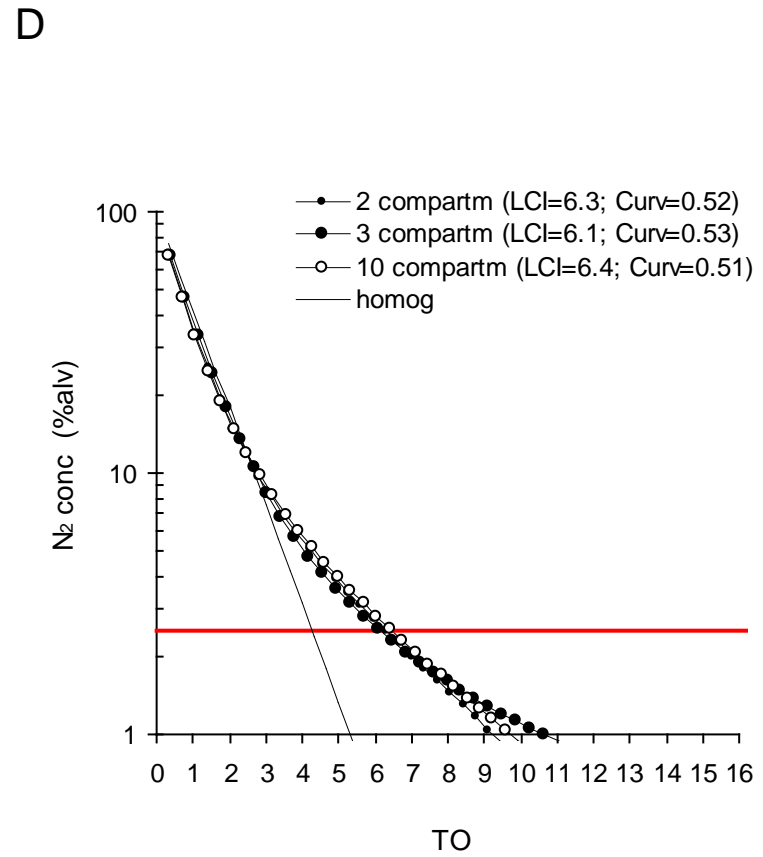

Supplement: verbanck_lci_in_adult_cf_fig_os3_r1.pdf [file verbanck_lci_in_adult_cf_fig_os3_r1.pdf]
